# Supplementary material for: The Interaction between Macrophages and Triple‐negative Breast Cancer Cells Induces ROS‐Mediated Interleukin 1α Expression to Enhance Tumorigenesis and Metastasis
Source: PubMed Central journal article supplement (PMC10582438; doi:10.1002/advs.202302857), 2023-08-08
Supplement: ADVS-10-2302857-s001.pdf [file ADVS-10-2302857-s001.pdf]

## Supporting Information

for *Adv. Sci.*, DOI 10.1002/adv.202302857

The Interaction between Macrophages and Triple-negative Breast Cancer Cells Induces ROS-Mediated Interleukin 1 $\alpha$  Expression to Enhance Tumorigenesis and Metastasis

*Meng Hao, Bin Huang, Renfei Wu, Zheng Peng and Kathy Qian Luo\**

**Supporting Information**

**The Interaction between Macrophages and Triple-negative Breast Cancer Cells Induces  
ROS-mediated Interleukin 1 $\alpha$  Expression to Enhance Tumorigenesis and Metastasis**

*Meng Hao<sup>1</sup>, Bin Huang<sup>1</sup>, Renfei Wu<sup>1</sup>, Zheng Peng<sup>1</sup>, Kathy Qian Luo<sup>1, 2\*</sup>*

Supplementary figures

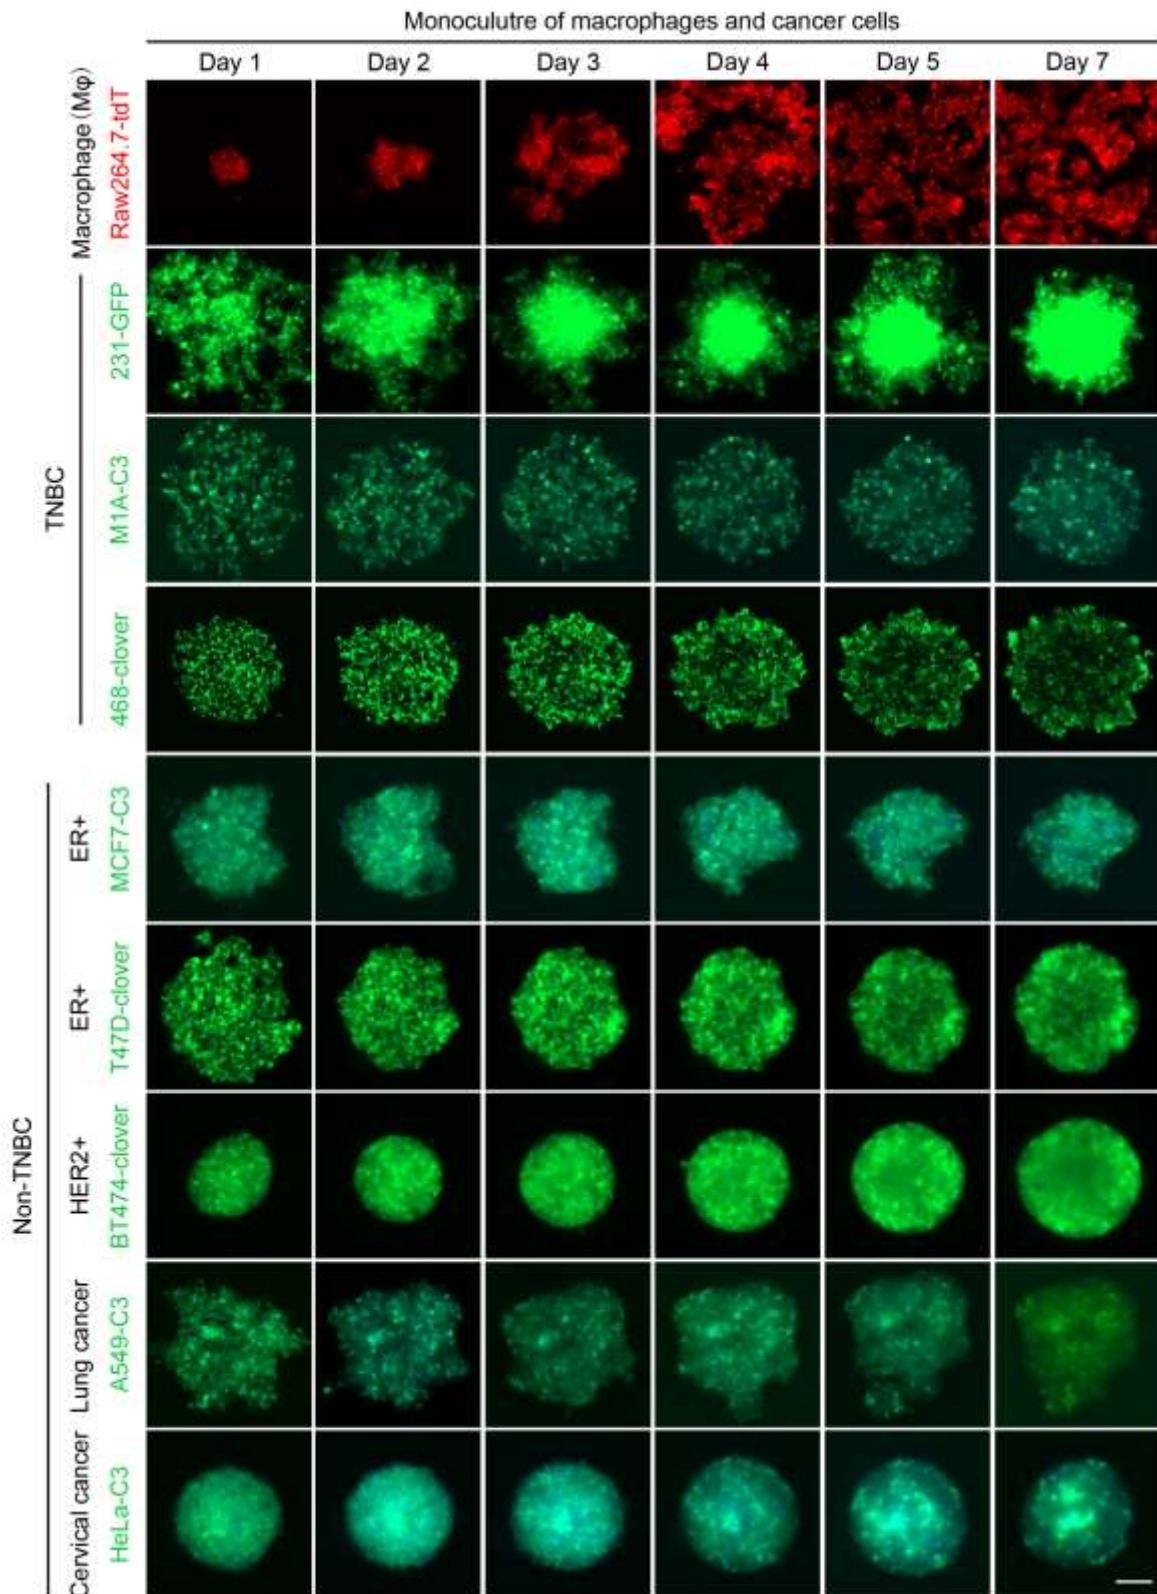

**Figure S1. Macrophages and cancer cells were monocultured in 3D conditions.** Macrophages and multiple types of cancer cells were monocultured in the low-attachment round bottom 96-well plates for 1–7 days. The number of macrophages at the initial of 3D

culture was 67 and the number of cancer cells at initial was 2000. tdT: red fluorescent protein; GFP and clover: green fluorescent protein; C3: apoptotic sensor cells emit green fluorescence in live cells and emit blue fluorescence in apoptotic cells.

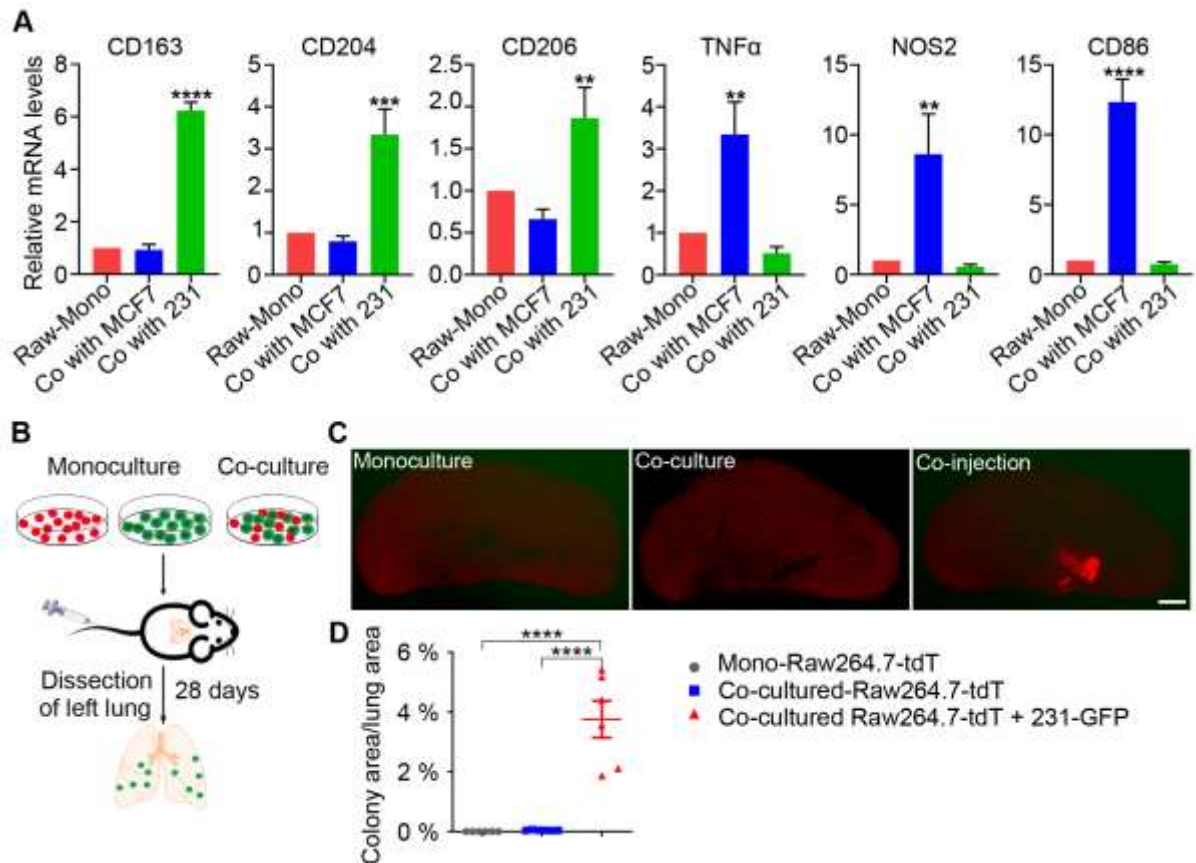

**Figure S2. Macrophages injected alone into the nude mice failed to form any lung colonies and TNBC cells induced macrophage polarization to M2 type.** (A) qPCR results showing the mRNA levels of M1 macrophage markers TNF $\alpha$ , NOS2, CD86 and M2 macrophage markers of CD163, CD204 and CD206 in Raw264.7 cells before and after 96 h of co-culturing with 231-GFP or MCF-7 cells. The results represent the means  $\pm$  SD from three independent experiments or from six mice. (B) Schematic diagram of the tail vein injection with mono- or co-cultured cells. (C) Representative lung images from the mice injected with mono- or co-cultured Raw264.7-tdT macrophages alone or Raw264.7-tdT co-cultured with 231-GFP cells through the tail vein for 28 days. ( $n = 6$  mice per group). Scale bar: 1 mm. (D) Percentage of the colony area formed by macrophages to the total left lung area of each treatment group. Significant differences were determined by one-way ANOVA. \*\* $P < 0.01$ , \*\*\* $P < 0.001$ , \*\*\*\* $P < 0.0001$ .

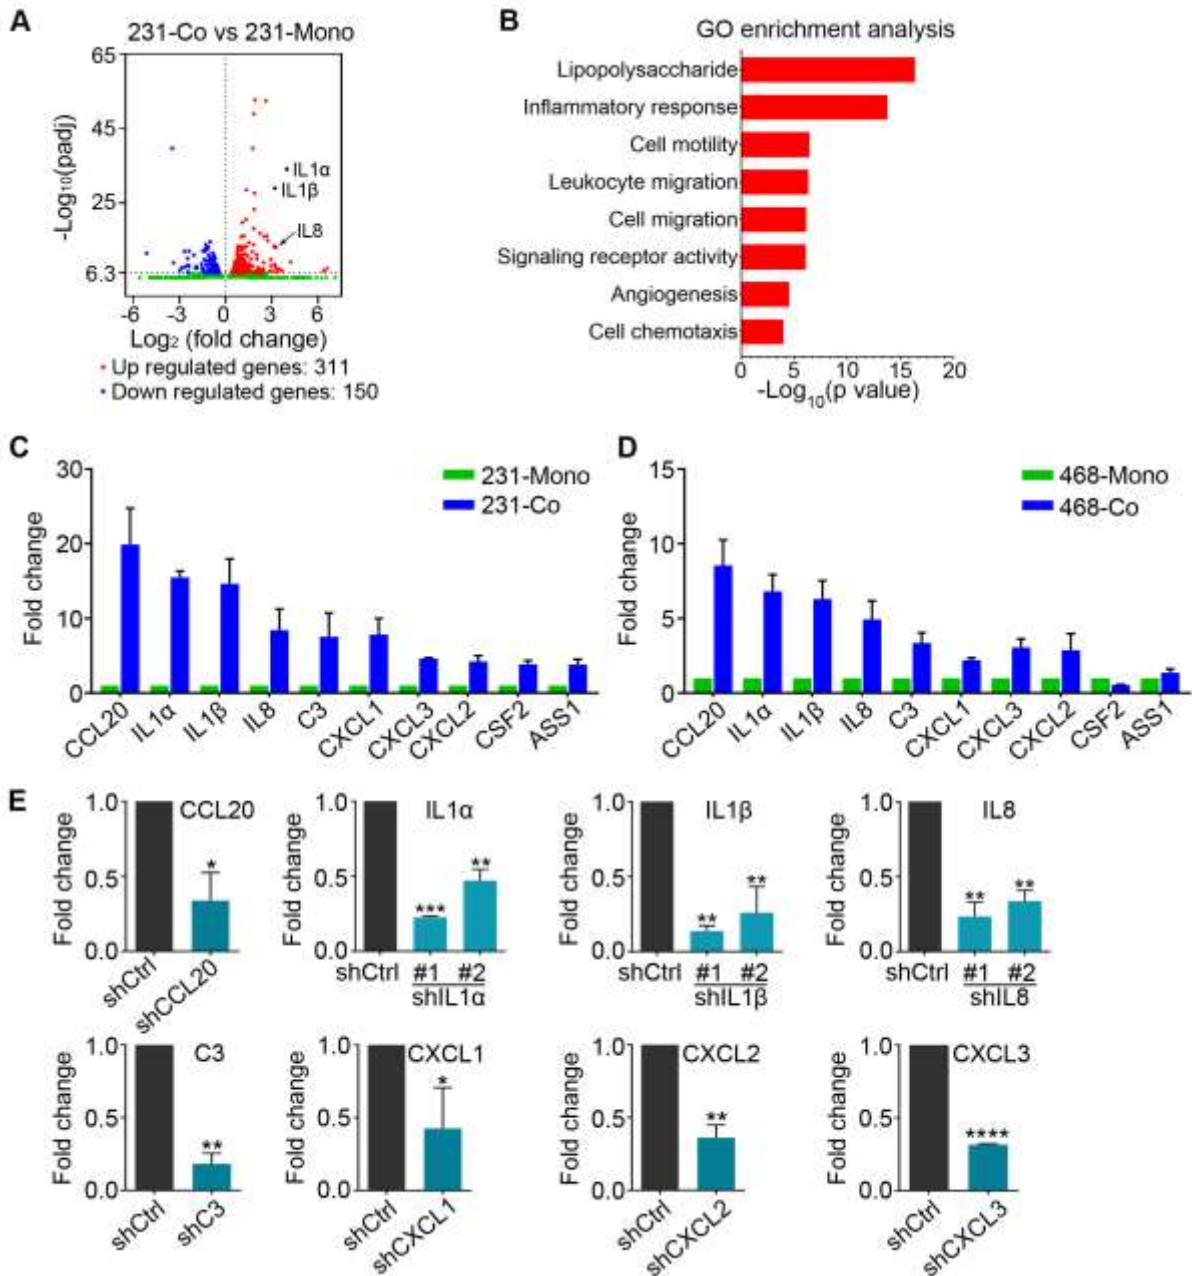

**Figure S3. Identification of the driver genes that were upregulated in the co-cultured TNBC cells.** (A) Volcano diagram of the differentially expressed genes. Red dots indicate upregulated genes, and blue dots indicate downregulated genes with the cut-off criteria of fold change  $> 1$  and  $P < 0.05$ . (B) GO enrichment analysis of the upregulated signaling pathways. (C and D) qPCR validation of the top 10 upregulated secreted genes in the 231-GFP or MDA-MB-468 cells after being co-cultured with Raw264.7-tdT macrophages. (E) qPCR results of the knockdown efficiency of the target genes in the 231-GFP cells with shRNAs. The results represent the means  $\pm$  SD from three independent experiments. Significant differences were determined by Student's t-test. \* $P < 0.05$ , \*\* $P < 0.01$ , \*\*\* $P < 0.001$  and \*\*\*\* $P < 0.0001$ .

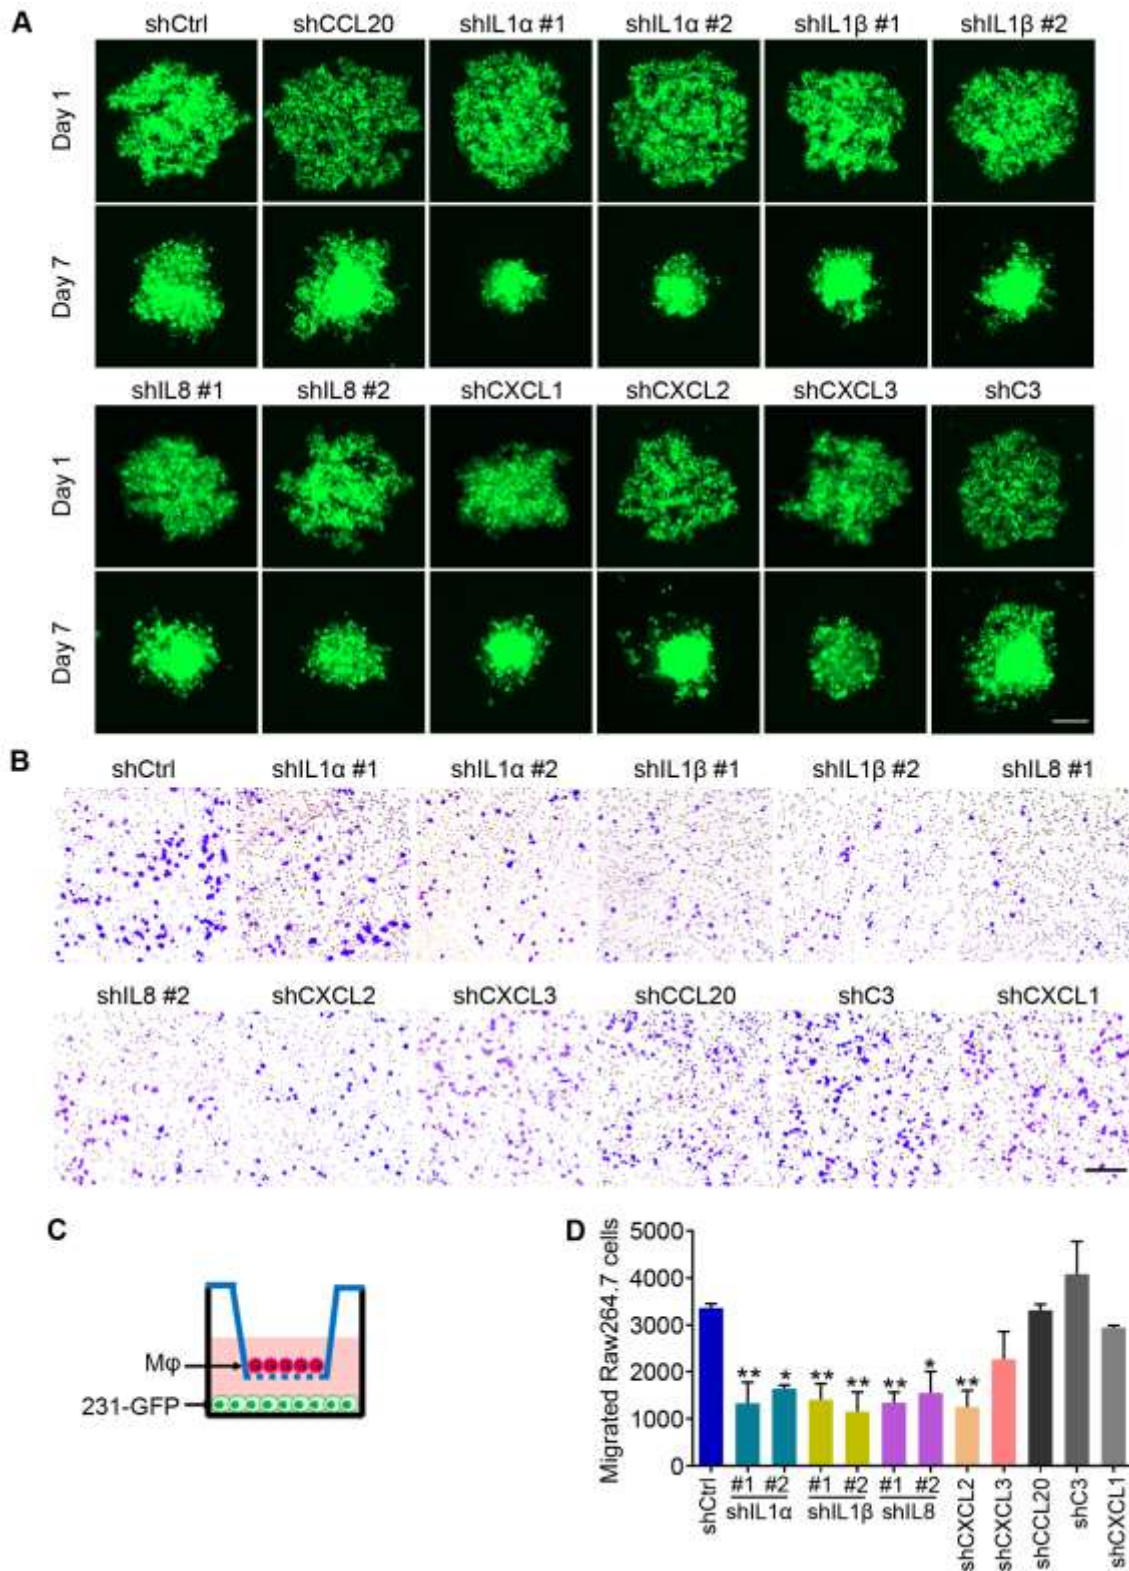

**Figure S4. Determining the importance of the candidate genes in enhancing the viability of 231-GFP cells and migration ability of Raw264.7 macrophages.** (A) Representative fluorescence images of the tumor spheres formed by the monocultured 231-GFP cells with or without the target gene knockdown. Scale bar, 200  $\mu$ m. (B and C) Schematic diagram (C) and representative images (B) of the Transwell analysis of the Raw264.7 macrophages with the

231-GFP cells seeded in the lower chamber of the Transwell insert. Scale bar, 200  $\mu\text{m}$ . **(D)** The quantified number of the migrated Raw264.7 cells. The results represent the means  $\pm$  SD from three independent experiments. Significant differences were determined by one-way ANOVA. \* $P < 0.05$  and \*\* $P < 0.01$ .

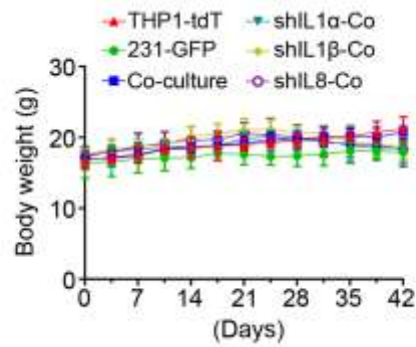

**Figure S5. Body weights of NOD/SCID mice implanted with orthotopic tumors.** Body weight of the NOD/SCID mice inoculated with mono- or co-cultured THP1-tdT macrophages and 231-GFP cells with or without the knockdown of IL1 $\alpha$ , IL1 $\beta$  and IL8. ( $n = 6$  NOD/SCID mice per group).



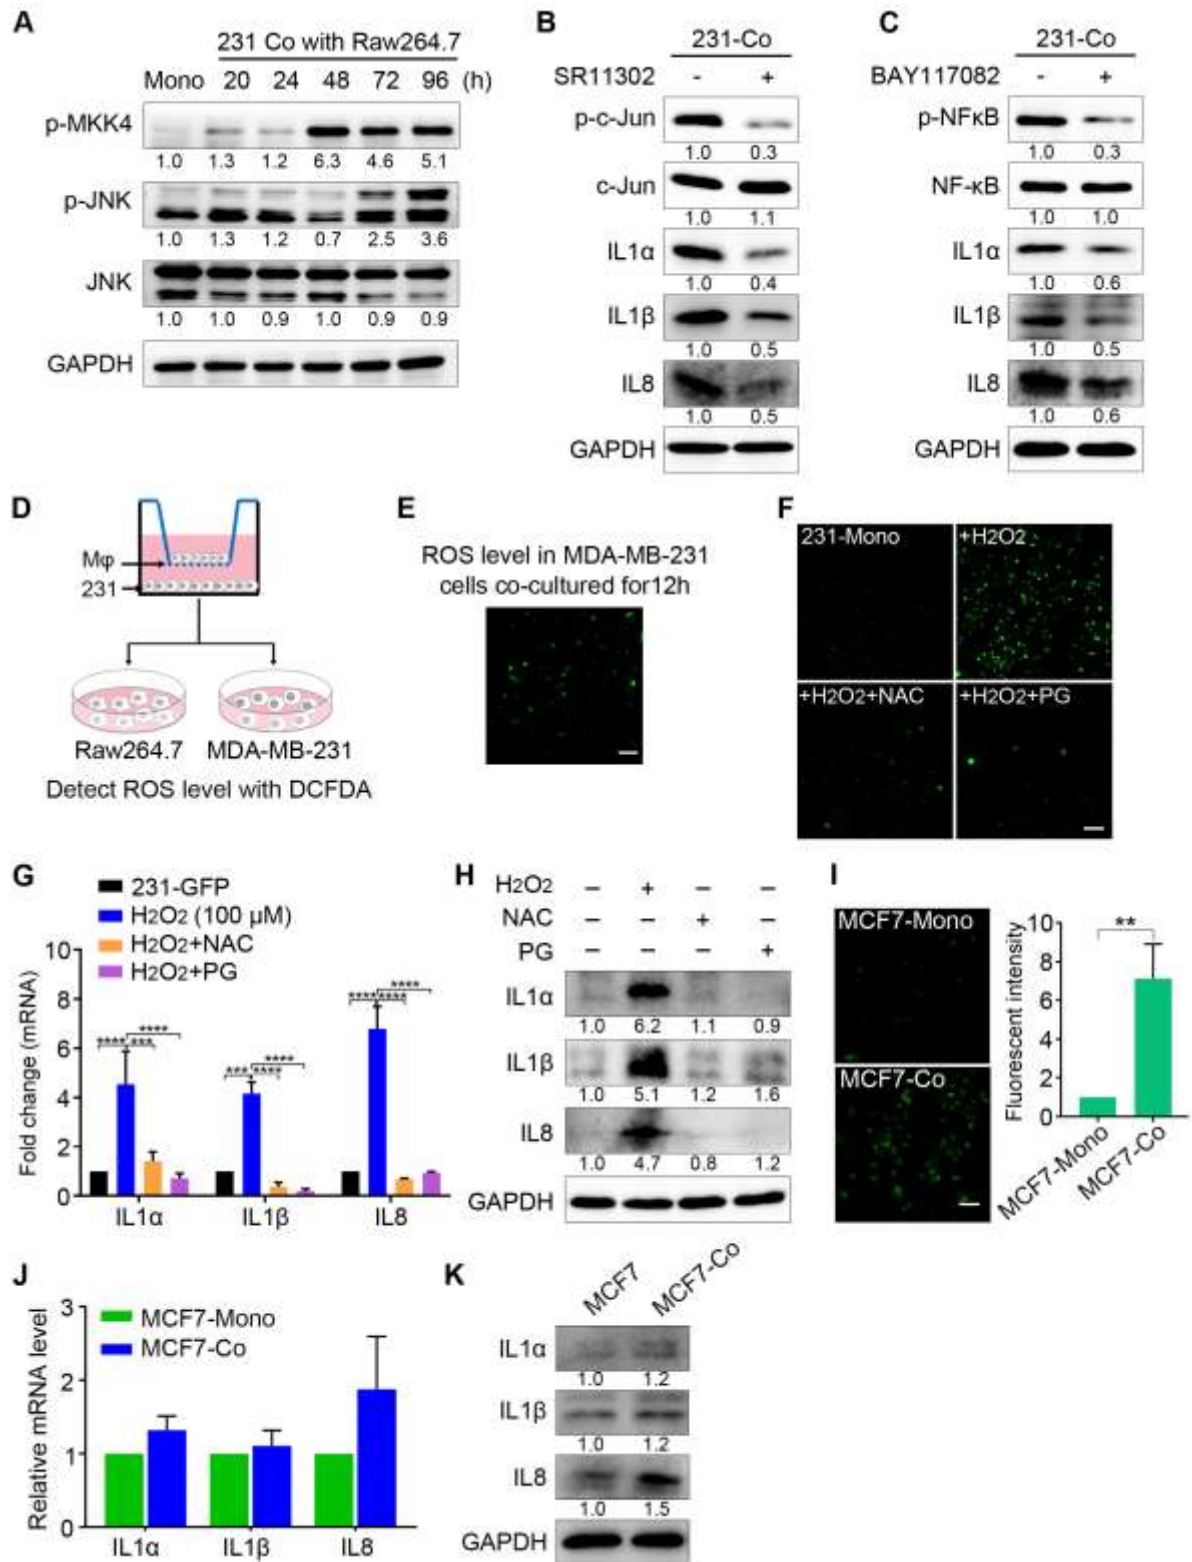

**Figure S6. ROS elevation activated the ERK1/2-c-Jun and NF- $\kappa$ B signaling pathways to upregulate the expression of IL1 $\alpha$ , IL1 $\beta$  and IL8 in TNBC cells. (A) Western blotting of the protein levels of p-MKK4, JNK and p-JNK in the mono- or co-cultured 231-GFP cells. (B) Western blotting of c-Jun, p-c-Jun, IL1 $\alpha$ , IL1 $\beta$  and IL8 in the 231-GFP cells with or without the treatment of the c-Jun inhibitor SR11303 (5  $\mu$ M) during 96 h of the co-culture treatment**

with Raw264.7 cells. The medium containing the inhibitor was replaced every two days. **(C)** Western blotting of NF- $\kappa$ B, p-NF- $\kappa$ B, IL1 $\alpha$ , IL1 $\beta$  and IL8 in 231-GFP cells with or without the treatment of the NF- $\kappa$ B inhibitor BAY117082 (2.5  $\mu$ M) during 96 h of the co-culture treatment with Raw264.7 cells. The medium containing the inhibitor was replaced every two days. **(D)** Schematic diagram showing the ROS detection in the MDA-MB-231 cells with DCFDA dye after the separated co-culture treatment with Raw264.7 macrophages. **(E)** DCFDA-stained fluorescence images of MDA-MB-231 cells co-cultured for 12 h. Scale bar, 100  $\mu$ m. **(F)** DCFDA-stained fluorescence images of the MDA-MB-231 cells, with or without the treatment with H<sub>2</sub>O<sub>2</sub> (100  $\mu$ M), NAC (5 mM) and PG (20  $\mu$ M). Scale bar, 100  $\mu$ m. **(G and H)** qPCR and Western blots showing the mRNA and protein levels of IL1 $\alpha$ , IL1 $\beta$  and IL8 in 231-GFP cells with or without the treatment with H<sub>2</sub>O<sub>2</sub> (100  $\mu$ M), NAC (5 mM) and PG (20  $\mu$ M). **(I)** (left) DCFDA-stained fluorescence images of the mono- or 16 h co-cultured MCF-7 cells. Scale bar, 100  $\mu$ m. (right) Quantified fluorescence intensity of ROS in MCF-7 cells. **(J and K)** qPCR and Western blots showing the mRNA and protein levels of IL1 $\alpha$ , IL1 $\beta$  and IL8 in MCF-7 cells after they were co-cultured with Raw264.7 macrophages. The results represent the means  $\pm$  SD from three independent experiments. Significant differences were determined by one-way ANOVA (G) and Student's t-test (I). \*\* $P$  < 0.01, \*\*\* $P$  < 0.001 and \*\*\*\* $P$  < 0.0001.

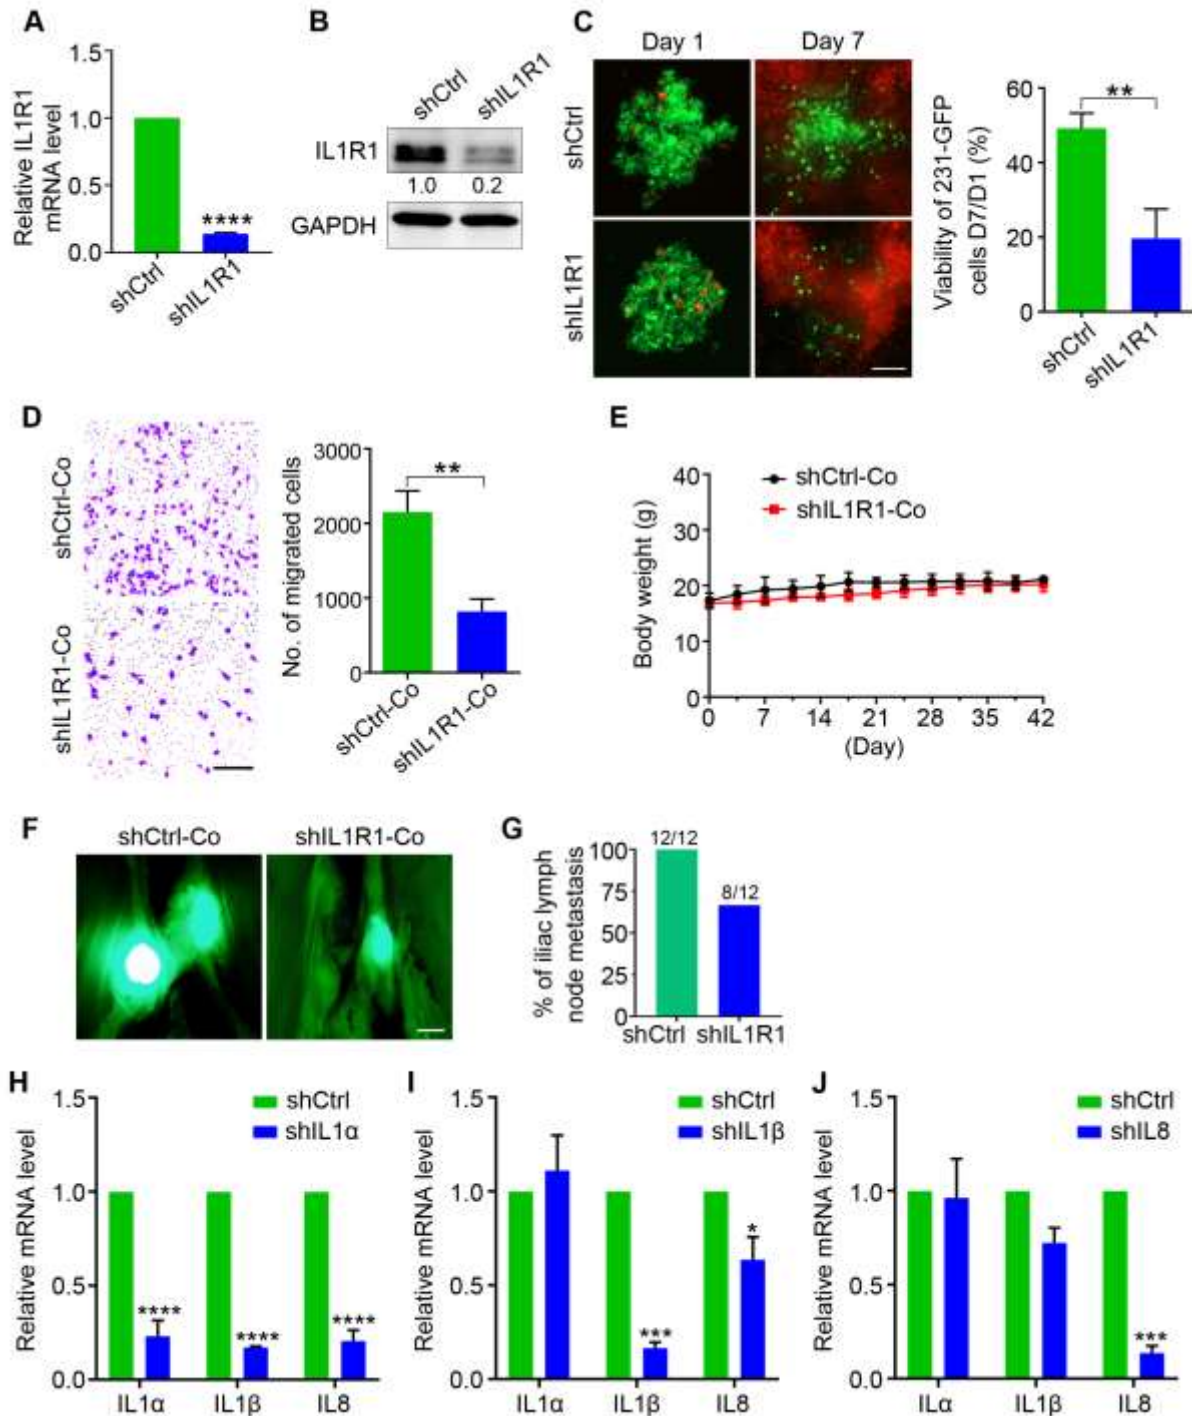

**Figure S7. Knockdown of IL1R1 reduced the viability and migration of the 231-GFP cells.** (A and B) qPCR and Western blots showing the mRNA and protein levels of IL1R1 in the 231-GFP cells transfected with IL1R1 shRNA. (C) (left) Representative fluorescence images of the tumor spheres formed by the 231-GFP cells with or without the IL1R1 knockdown when co-cultured with Raw264.7-tdT cells. Scale bar, 200  $\mu$ m. (right) Quantification of the total green fluorescence intensity indicated the viability of the 231-GFP cells on day 7 compared to day 1. (D) Representative images and the quantified results of the Transwell migration assay of the 231-GFP cells with or without the IL1R1 knockdown. Scale bar, 200  $\mu$ m. (E) Body weight of the NOD/SCID mice inoculated with co-cultured THP1-tdT macrophages plus 231-GFP cells

with or without the IL1R1 knockdown. (F) Representative images of the iliac lymph node metastatic tumors of each treatment group which were harvested on day 42. Scale bar, 1 mm. (G) Incidence of lymphatic metastasis of each treatment group. (H to J) qPCR results showing the mRNA levels of IL1 $\alpha$ , IL1 $\beta$  and IL8 when each of them was knocked down in the 231-GFP cells. The results represent the means  $\pm$  SD from three independent experiments or from six mice. Significant differences were determined by Student's t-test. \* $P < 0.05$ , \*\* $P < 0.01$ , \*\*\* $P < 0.001$  and \*\*\*\* $P < 0.0001$ .

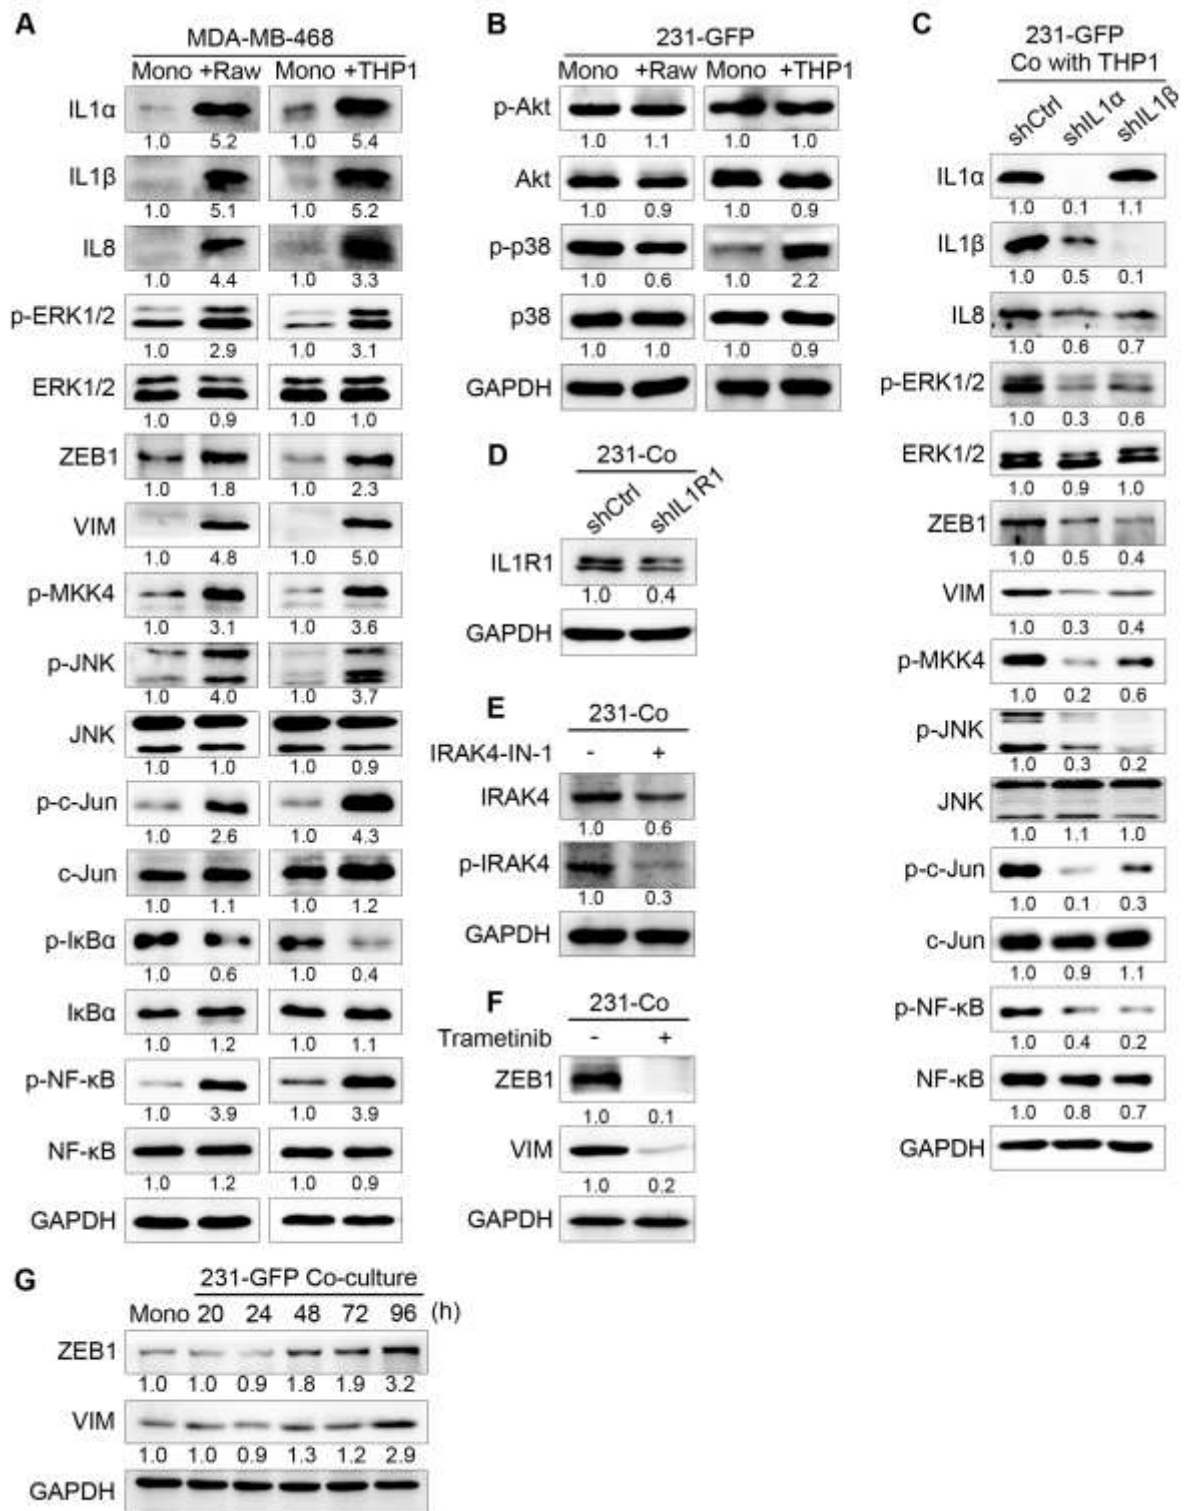

**Figure S8. IL1α activated three signaling pathways mediated by ERK1/2, MKK4 and NF-κB during the co-culture of TNBC cells with macrophages.** (A) Western blots showing the total or phosphorylated protein levels of IL1α, IL1β, IL8, ERK1/2, ZEB1, VIM, MKK4, JNK, c-Jun, IκBα and NF-κB in the MDA-MB-468 cells before and after 96 h of the co-culture treatment with Raw264.7-tdT or THP1-tdT macrophages. (B) Western blots showing the total

or phosphorylated Akt and p38 in the 231-GFP cells before or after 96 h of the co-culture treatment with Raw264.7-tdT or THP1-tdT macrophages. **(C)** Western blots showing the knockdown effects of IL1 $\alpha$  and IL1 $\beta$  on themselves and other indicated proteins in the 231-GFP cells co-cultured with THP1-tdT macrophages for 96 h. **(D)** Western blots showing the expression level of IL1R1 in the co-cultured 231-GFP cells with or without the IL1R1 knockdown. **(E)** Western blotting of the IRAK4 and p-IRAK4 in co-cultured 231-GFP cells with or without the addition of IRAK4 inhibitor (IRAK4-IN-1, 5  $\mu$ M) during the co-culture treatment. **(F)** Western blotting of ZEB1 and Vimentin in the 231-GFP cells with or without the addition of MEK inhibitor (trametinib, 10 nM) during the co-culture treatment with Raw264.7-tdT cells. **(G)** Western blotting of ZEB1 and Vimentin in the mono- or co-cultured 231-GFP cells.

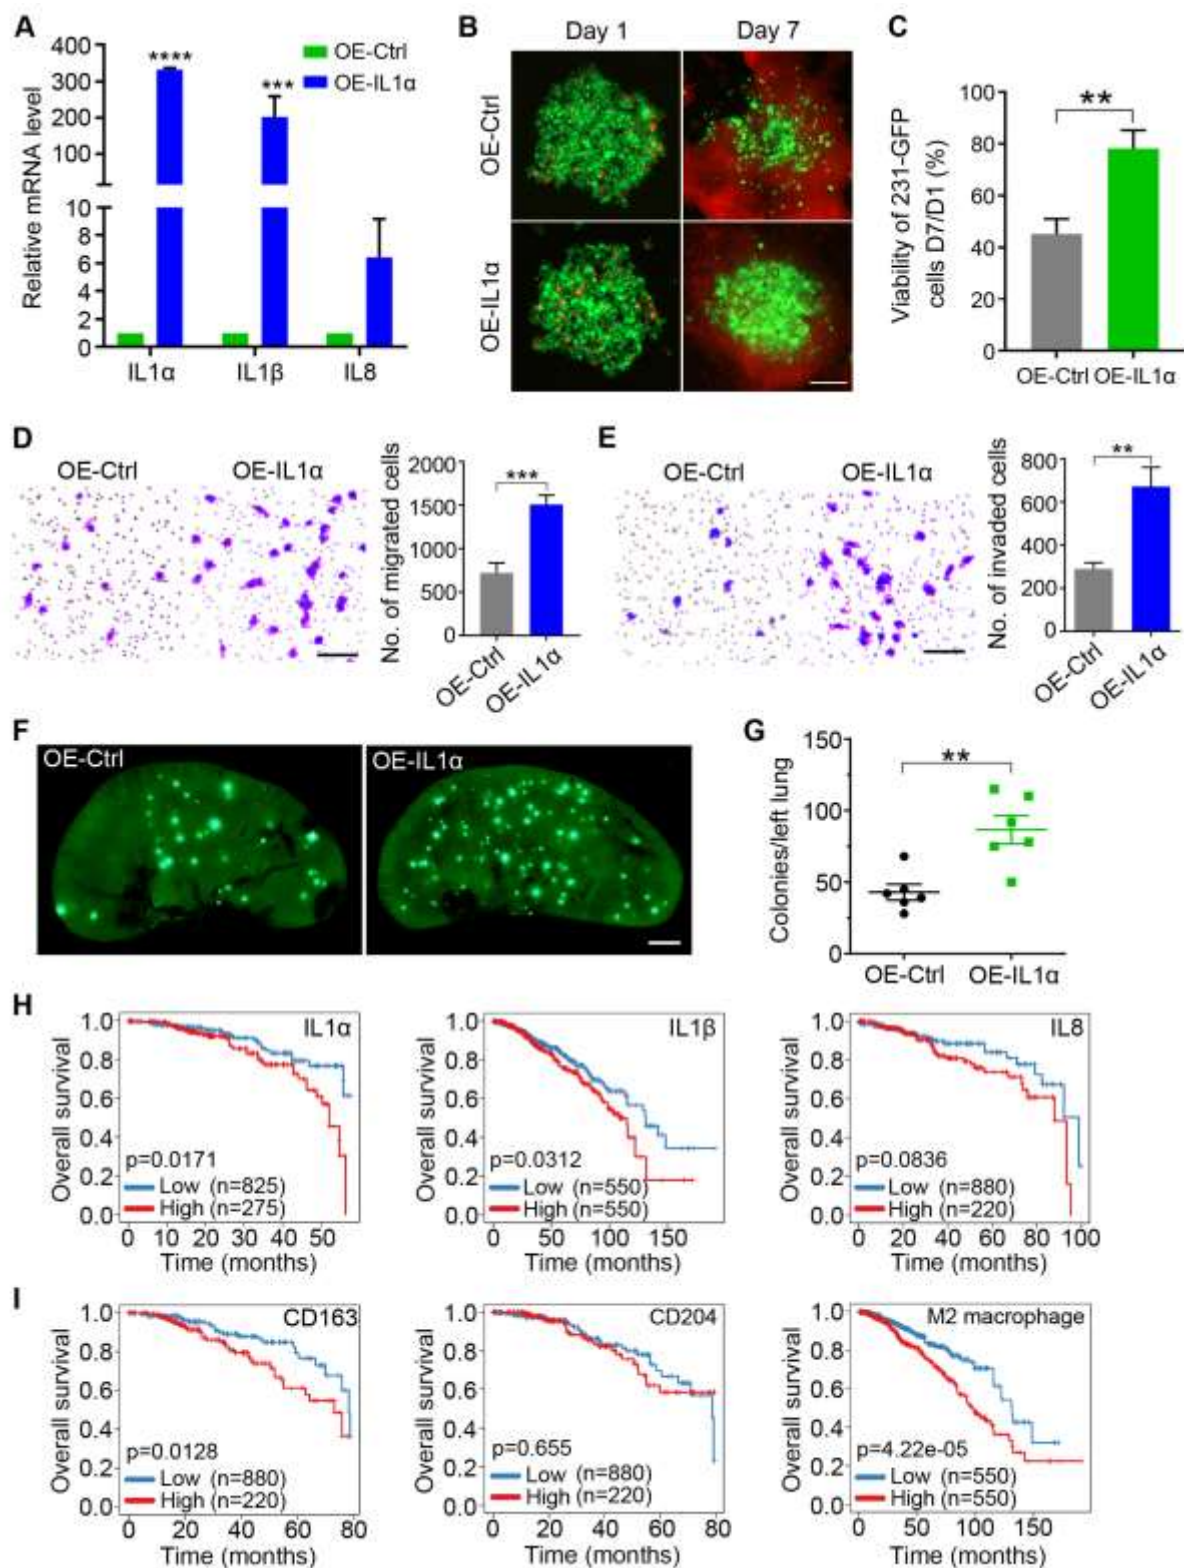

**Figure S9. Overexpression of IL1 $\alpha$  upregulated IL1 $\beta$  and IL8 and promoted the survival, migration, invasion and lung metastatic ability of 231-GFP cells. (A)** qPCR results showing the mRNA levels of IL1 $\alpha$ , IL1 $\beta$  and IL8 in the 231-GFP cells with or without the overexpression of IL1 $\alpha$ . **(B)** Representative fluorescence images of the tumor spheres formed by the 231-GFP cells with or without the overexpression of IL1 $\alpha$  when co-cultured with

Raw264.7-tdT cells. Scale bar, 200  $\mu\text{m}$ . (C) Quantification of the total green fluorescence intensity indicating the viability of the 231-GFP cells on day 7 compared to day 1. (D and E) Representative images and the quantified results of the Transwell migration (D) and invasion (E) assays of the 231-GFP cells with or without the overexpression of IL1 $\alpha$ . Scale bar, 200  $\mu\text{m}$ . (F and G) Representative fluorescence images and the quantified lung colony number of the 231-GFP cells with or without the overexpression of IL1 $\alpha$  on day 28 after the tail vein injection of the nude mice ( $n = 6$  nude mice per group). Scale bar, 1 mm. (H and I) Correlation between the expression levels of IL1 $\alpha$ , IL1 $\beta$ , IL8, CD163, CD204 or M2 macrophage infiltration and overall survival curves in patients with breast cancer analyzed on the TIMER 2.0 platform. The results represent the means  $\pm$  SD from three independent experiments or from six mice. Significant differences were determined by Student's t-test. \*\* $P < 0.01$ , \*\*\* $P < 0.001$  and \*\*\*\* $P < 0.0001$ .

## Supplementary tables

**Table S1. List of homo specific primers.**

| Gene name    | Forward (5'-3')          | Reverse (5'-3')          |
|--------------|--------------------------|--------------------------|
| GAPDH        | CCCCACCACACTGAATCTCC     | GTACATGACAAGGTGCGGCT     |
| IL1 $\alpha$ | TGGTAGTAGCAACCAACGGGA    | ACTTTGATTGAGGGCGTCATTC   |
| IL1 $\beta$  | ATGATGGCTTATTACAGTGGCAA  | GTCGGAGATTCGTAGCTGGA     |
| IL8          | ACTGAGAGTGATTGAGAGTGGAC  | AACCCTCTGCACCCAGTTTTC    |
| CXCL1        | ACTCTACCTGCACACTGTCCTA   | CATTTGCTTGGATCCGCCAG     |
| CXCL2        | TGAATCTACTTGCACACTCTCCC  | TACATTTCCCTGCCGTCACAT    |
| CXCL3        | TTCTAGGGACAGCTGGAAAGG    | TCCCCACCCTGTCATTTATCA    |
| CCL20        | TGCTGTACCAAGAGTTTGCTC    | CGCACACAGACAACCTTTTTCTTT |
| C3           | GGGGAGTCCCATGTACTCTATC   | GGAAGTCGTGGACAGTAACAG    |
| CSF2         | GGAGCATGTGAATGCCATCCAG   | CTGGAGGTCAAACATTTCTGAGAT |
| ASS1         | TGTGCTTATAACCTGGGATGGG   | CGGCGTCTGGAATCTGTTTT     |
| IL1R1        | ATGAAATTGATGTTTCGTCCCTGT | ACCACGCAATAGTAATGTCCTG   |

**Table S2. List of shRNAs.**

| shRNA name        | Target sequence (5'-3') |
|-------------------|-------------------------|
| shIL1 $\alpha$ #1 | TGAAACCTCTAAAACATCCAA   |
| shIL1 $\alpha$ #2 | GCCCTCAATCAAAGTATAATT   |
| shIL1 $\beta$ #1  | AGCAACCGCTTCCCTATTTAT   |
| shIL1 $\beta$ #2  | TCACCTCTCCTACTCACTTAA   |
| shIL8#1           | CCAGATGCAATACAAGATTCC   |
| shIL8#2           | TGCGCCAACACAGAAATTATT   |



|         |                        |
|---------|------------------------|
| shIL1R1 | TGGTATAGATGCAGCATATAT  |
| shCXCL1 | ATATTTTAGGGTGTAAAATAAT |
| shCXCL2 | CTTGCACACTCTCCCATTATA  |
| shCXCL3 | TTACGAGGGTTCTACTTATTT  |
| shCCL20 | TCCAAAACAGACTTGGGTGAA  |
| shC3    | AGTTCAAGTCAGAAAAGGGGG  |

**Table S3. List of overexpression vector.**

| Vector name  | Transcript ID | Sequence length |
|--------------|---------------|-----------------|
| IL1 $\alpha$ | NM_000575.5   | 816 bp          |

**Table S4. List of primary and secondary antibodies.**

| Antibody name                             | Company    | Catalog #  | Application and concentration       |
|-------------------------------------------|------------|------------|-------------------------------------|
| IL1 $\alpha$ , mouse                      | Santa Cruz | sc-9983    | WB (1:500), IF (1:100), IHC (1:100) |
| IL1 $\beta$ , mouse                       | Santa Cruz | sc-32294   | WB (1:500), IF (1:100)              |
| IL8, rabbit                               | CST*       | 94407      | WB (1:1000), IF (1:100)             |
| IL1R1, mouse                              | Santa Cruz | sc-393998  | WB (1:1000)                         |
| IRAK4, rabbit                             | CST        | 4363S      | WB (1:1000)                         |
| p-IRAK4, rabbit                           | CST        | 11927S     | WB (1:1000)                         |
| p-MKK4 (Ser257), rabbit                   | CST        | 4514       | WB (1:1000)                         |
| JNK, rabbit                               | CST        | 9252       | WB (1:1000)                         |
| p-JNK (Thr183/Tyr185), rabbit             | CST        | 9251       | WB (1:1000)                         |
| c-Jun, rabbit                             | CST        | 9165       | WB (1:1000)                         |
| p-c-Jun (Ser73)                           | CST        | 3270       | WB (1:1000)                         |
| ERK1/2, rabbit                            | CST        | 4695       | WB (1: 1000)                        |
| p-ERK1/2 (Thr202/Tyr204), rabbit          | CST        | 4370       | WB (1: 1000)                        |
| ZEB1, rabbit                              | Novus      | NBP1-88845 | WB (1:1000)                         |
| Vimentin, rabbit                          | CST        | 5741       | WB (1:1000)                         |
| I $\kappa$ B $\alpha$ , mouse             | CST        | 4814       | WB (1:1000)                         |
| p-I $\kappa$ B $\alpha$ (Ser32/36), mouse | CST        | 9246       | WB (1:1000)                         |
| NF- $\kappa$ B, rabbit                    | CST        | 8242       | WB (1:1000)                         |
| p-NF- $\kappa$ B (Ser536), rabbit         | CST        | 3033       | WB (1:1000)                         |
| AKT, rabbit                               | CST        | 4691       | WB (1:1000)                         |
| p-AKT (Ser473), rabbit                    | CST        | 4060       | WB (1:1000)                         |

|                                                                     |            |           |                         |
|---------------------------------------------------------------------|------------|-----------|-------------------------|
| p38, rabbit                                                         | CST        | 8690      | WB (1:1000)             |
| p-p38 (Thr180/Tyr182), rabbit                                       | CST        | 4511      | WB (1:1000)             |
| GAPDH, rabbit                                                       | CST        | 2118      | WB (1:5000)             |
| F4/80, rat                                                          | Abcam      | ab6640    | IF (1:100)              |
| CD204, rabbit                                                       | Thermo     | PA5-22596 | IF (1:100), IHC (1:500) |
| CD206, goat                                                         | R&D        | AF2535    | IF (1:100)              |
| CD163, rabbit                                                       | Abcam      | Ab18442   | IF (1:100), IHC (1:500) |
| Goat anti-Rabbit IgG (H+L) 2 <sup>nd</sup> Ab, HRP                  | Bio-Rad    | 1706515   | WB (1:5000)             |
| Goat anti-Mouse IgG (H+L)- 2 <sup>nd</sup> Ab, HRP                  | Invitrogen | 31430     | WB (1:5000)             |
| Goat anti-Rat IgG (H+L) 2 <sup>nd</sup> Ab, Alexa Fluor Plus 488    | Invitrogen | A11006    | IF (1:100)              |
| Donkey anti-Goat IgG (H+L) 2 <sup>nd</sup> Ab, Alexa Fluor Plus 594 | Invitrogen | A11058    | IF (1:100)              |
| Goat anti-Rabbit IgG (H+L) 2 <sup>nd</sup> Ab, Alexa Fluor Plus 488 | Invitrogen | A32731    | IF (1:100)              |
| Goat anti-Mouse IgG (H+L) 2 <sup>nd</sup> Ab, Alexa Fluor Plus 488  | Invitrogen | A11029    | IF (1:100)              |

\*CST, Cell Signaling Technology, USA.
